# Supplementary material for: Sustainable tailor-made and bio-based high-performance lubricants that combine biorenewability, biodegradability and economic efficiency
Source: Royal Society of Chemistry journal article supplement (doi:10.1039/d3gc00135k), 2023-01-01
Supplement: d3gc00135k1.pdf [file d3gc00135k1.pdf]

## **Supplementary Information**

### **Sustainable tailor-made and bio-based high-performance lubricants that combine biorenewability, biodegradability and economic efficiency**

Luisa Koch,<sup>a</sup> Alina Guntermann,<sup>a</sup> Katharina Hirschbichler,<sup>b</sup> Carmen Plass,<sup>a</sup> Tobias Betke,<sup>a</sup> Ling Ma,<sup>b</sup> Thomas Kilthau,<sup>b</sup> and Harald Gröger\*<sup>a</sup>

<sup>1</sup> Chair of Industrial Organic Chemistry and Biotechnology, Faculty of Chemistry, Bielefeld University, Universitätsstraße. 25, 33615 Bielefeld, Germany; E-mail: [harald.groeger@uni-bielefeld.de](mailto:harald.groeger@uni-bielefeld.de)

<sup>2</sup> Global Product Innovation, Klüber Lubrication München GmbH & Co. KG, Geisenhausenerstraße 7, 81379 München, Germany

## Supplementary Figures

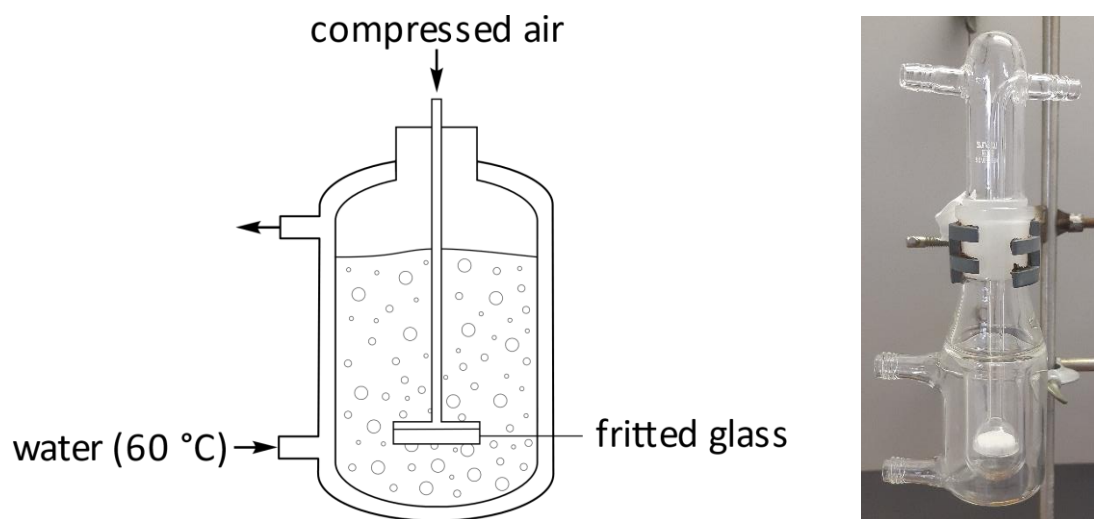

**Supplementary Figure 1.** Schematic diagram (left) and photo (right) of the designed reactor. All experiments were performed in a double-walled glass reactor heated by a cryostat. Good mixing and expulsion of volatiles was achieved by passing compressed air through the reaction mixture by using a gas wash bottle adapter with a fine-pored glass filter.

## Supplementary Tables

**Supplementary Table 1.** Chemical-physical properties of oligomers from the oligomerization of hydroxymethylated stearic acid methyl ester.

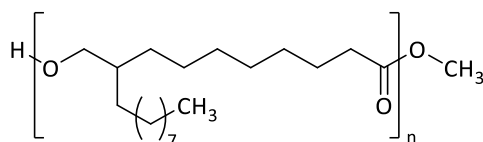

|                                          | 2 h   | 4 h   | 6 h   | 8 h   | 24 h  |
|------------------------------------------|-------|-------|-------|-------|-------|
| Viscosity at 40 °C [mm <sup>2</sup> /s]  | 94.1  | 192.2 | 407.8 | 459.0 | 563.9 |
| Viscosity at 100 °C [mm <sup>2</sup> /s] | 12.7  | 23.7  | 46.0  | 51.4  | 64.1  |
| Viscosity index                          | 130.7 | 151.5 | 171.2 | 175.4 | 187.3 |
| Pour point [°C]                          | -6    | -12   | -18   | -18   | -27   |
| Number average molar mass [g/mol]        | 1048  | 1562  | 2290  | 2370  | 2459  |
| Oligomerization degree <i>n</i>          | 3.5   | 5.2   | 7.7   | 8.0   | 8.3   |

**Supplementary Table 2:** Chemical-physical properties of oligomers from the oligomerization of hydroxymethylated stearic acid 2-ethylhexyl ester.

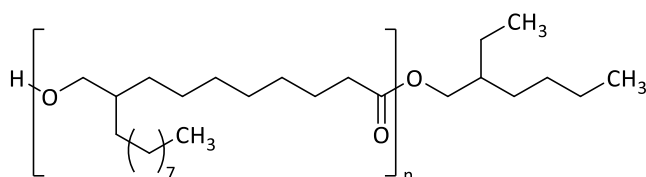

|                                          | 2 h   | 4 h   | 6 h   | 8 h   |
|------------------------------------------|-------|-------|-------|-------|
| Viscosity at 40 °C [mm <sup>2</sup> /s]  | 52.3  | 56.8  | 58.1  | 60.3  |
| Viscosity at 100 °C [mm <sup>2</sup> /s] | 7.7   | 8.5   | 8.6   | 9.8   |
| Viscosity index                          | 110.5 | 123.0 | 121.4 | 122.1 |
| Pour point [°C]                          | -24   | -27   | -27   | -27   |
| Number average molar mass [g/mol]        | 966   | 854   | 859   | 956   |

**Supplementary Table 3:** Chemical-physical properties of oligomers from the oligomerization of mixtures of hydroxymethylated stearic acid methyl and 2-ethylhexyl esters.

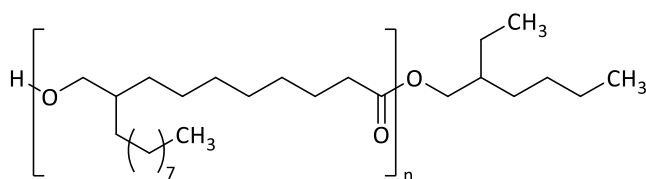

|                                          | <b>9:1</b> | <b>7:1</b> | <b>5:1</b> | <b>3:1</b> |
|------------------------------------------|------------|------------|------------|------------|
| Viscosity at 40 °C [mm <sup>2</sup> /s]  | 104.1      | 105.8      | 109.0      | 104.1      |
| Viscosity at 100 °C [mm <sup>2</sup> /s] | 13.9       | 14.1       | 14.6       | 13.8       |
| Viscosity index                          | 135.0      | 136.1      | 138.1      | 132.8      |
| Pour point [°C]                          | -9         | -15        | -15        | -15        |
| Number average molar mass [g/mol]        | 1092       | 1308       | 1256       | 1141       |

**Supplementary Table 4:** Chemical-physical properties of oligomers from the oligomerization of hydroxymethylated stearic acid methyl ester with 2-ethylhexanol.

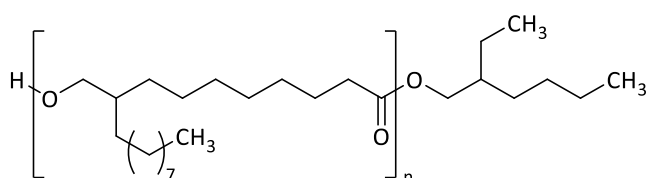

| <b>Equivalents of the alcohol</b>        | <b>0.05</b> | <b>0.10</b> | <b>0.15</b> | <b>0.20</b> | <b>0.25</b> | <b>0.30</b> |
|------------------------------------------|-------------|-------------|-------------|-------------|-------------|-------------|
| Viscosity at 40 °C [mm <sup>2</sup> /s]  | 127.9       | 112.4       | 103.2       | 96.7        | 101.7       | 92.0        |
| Viscosity at 100 °C [mm <sup>2</sup> /s] | 16.6        | 14.8        | 13.7        | 12.3        | 13.5        | 12.4        |
| Viscosity index                          | 139.7       | 135.2       | 133.5       | 131.5       | 132.4       | 129.0       |
| Pour point [°C]                          | -12         | -9          | -12         | -12         | -12         | -12         |
| Number average molar mass [g/mol]        | 1261        | 1172        | 1136        | 1106        | 1151        | 1097        |

**Supplementary Table 5:** Chemical-physical properties of oligomers from the oligomerization of hydroxymethylated stearic acid methyl ester with 2-hexyldecanol.

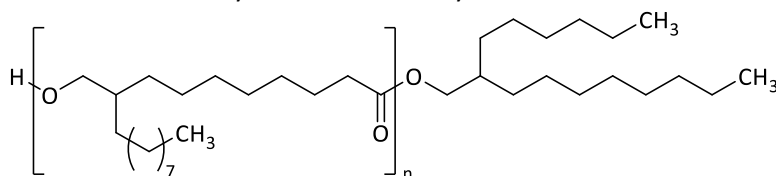

| <b>Equivalents of the alcohol</b>        | <b>0.05</b> | <b>0.10</b> | <b>0.15</b> | <b>0.20</b> | <b>0.25</b> | <b>0.30</b> |
|------------------------------------------|-------------|-------------|-------------|-------------|-------------|-------------|
| Viscosity at 40 °C [mm <sup>2</sup> /s]  | 125.3       | 112.6       | 110.4       | 108.9       | 94.6        | 78.3        |
| Viscosity at 100 °C [mm <sup>2</sup> /s] | 16.2        | 14.8        | 14.4        | 14.1        | 12.4        | 10.6        |
| Viscosity index                          | 138.1       | 135.8       | 132.8       | 131.1       | 125.5       | 119.7       |
| Pour point [°C]                          | -12         | -12         | -15         | -15         | -15         | -15         |
| Number average molar mass [g/mol]        | 1234        | 1216        | 1163        | 1147        | 1056        | 958         |

**Supplementary Table 6:** Overview of all chemical substrates used, the company where they were purchased and their purity.

| Chemical substrate                                | Company      | Purity / % |
|---------------------------------------------------|--------------|------------|
| Hydroxymethylated stearic acid methyl ester       | OQ Chemicals | 85         |
| Hydroxymethylated stearic acid 2-ethylhexyl ester | OQ Chemicals | 88         |
| 2-Ethylhexanol                                    | Alfa Aesar   | 99         |
| 2-Hexyldecanol                                    | Sasol Place  | 96         |

## Supplementary Methods

### Calculation of the degree of oligomerization

The degree of oligomerization was calculated according to the following formula:

$$n = \frac{M_n - M_{\text{end group}}}{M_{\text{repetitive unit}}}$$

Thereby  $n$  is the degree of oligomerization,  $M_n$  is the number average molar mass,  $M_{\text{end group}}$  is the molar mass of the end group (15 g/mol) and  $M_{\text{repetitive unit}}$  is the molar mass of the repetitive unit (296 g/mol).

### OECD 301 F test

OECD 301 F test was performed according to the standard OECD 301 F with Fima OxiTop-C sensor heads (Xylem Analytics Germany Sales GmbH & Co. KG, Weilheim, Germany). For the OECD 301 F test, an inoculum is required. Inoculum is a liquid from an aeration tank of a municipal wastewater treatment plant. This liquid was diluted (100 mL/L nutrient solution) and adjusted to a pH of 7.4. The nutrient solution (164 mL) and the sample (approx. 6 mg) are then placed in a bottle. The bottle is enriched with NaOH and then hermetically sealed with the measuring heads. When the sample is degraded by the bacteria, oxygen is bound and CO<sub>2</sub> is released, which binds to the NaOH. This creates a negative pressure in the bottles, which is detected by the measuring heads. For evaluation, it is calculated how much oxygen would be consumed in the case of complete degradation and this is compared with the oxygen actually consumed. This results in the biodegradability in percent.
